# Supplementary material
Source: Springer Nature journal article supplement (https://www.springermedizin.de/resource/supplementary/12985_2010_1108_MOESM2_ESM.pdf/9609160)

## H strain

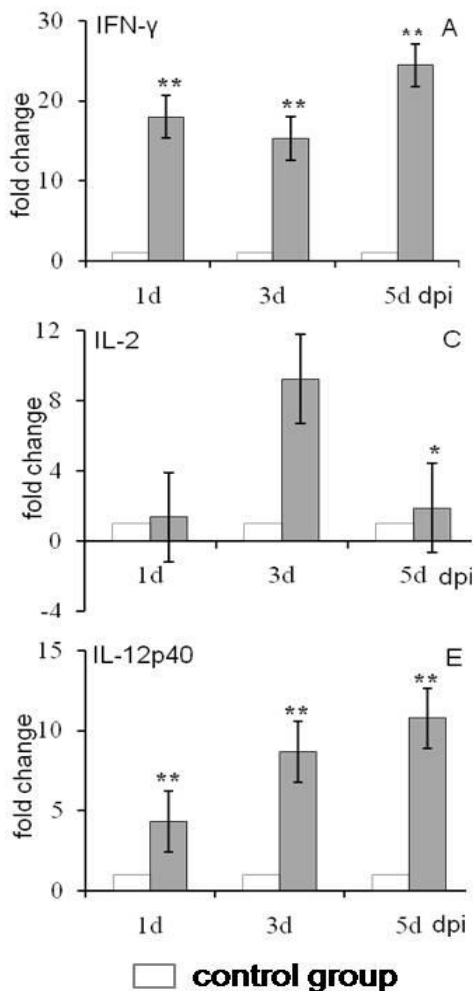

## Ts strain

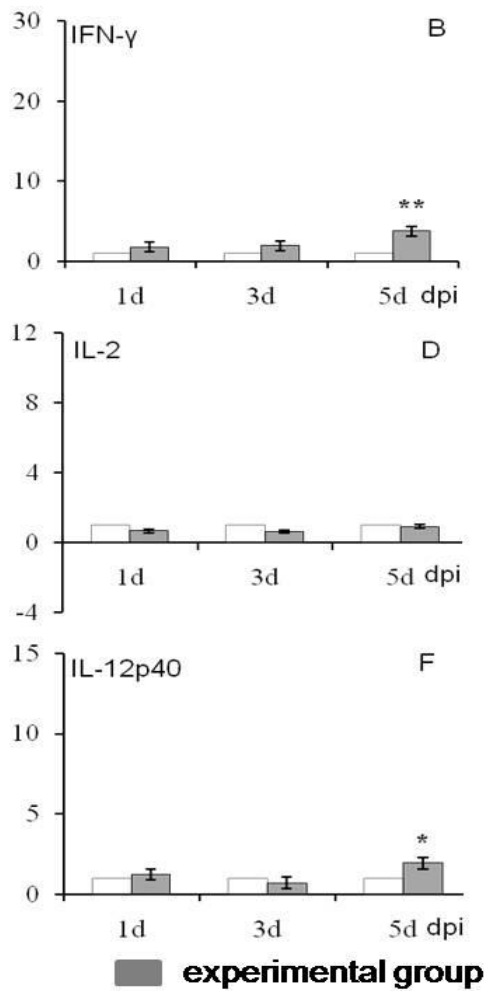

Supplement: MOESM2 [file 9609160]
